# Supplementary material for: Frailty and bone health in European men
Source: PubMed Central journal article supplement (PMC5859977; doi:10.1093/ageing/afw205), 2016-11-16
Supplement: afw205_aa-16-0377-file001.pdf [file afw205_aa-16-0377-file001.pdf]

**Supplementary Table 1.** Components of the Fried phenotype and bone health parameters

| Component of the Fried frailty category (presence vs absence) <sup>a</sup> | Heel quantitative ultrasound                       |                      |                      | Areal bone mineral density                         |                           |
|----------------------------------------------------------------------------|----------------------------------------------------|----------------------|----------------------|----------------------------------------------------|---------------------------|
|                                                                            | SOS                                                | BUA                  | QUI                  | Lumbar spine                                       | Femoral neck              |
|                                                                            | Adjusted $\beta$ coefficient (95% CI) <sup>b</sup> |                      |                      | Adjusted $\beta$ coefficient (95% CI) <sup>a</sup> |                           |
| Low physical activity                                                      | -4.6 (-8.6, -0.5)*                                 | -0.9 (-3.1, 1.4)     | -2.3 (-4.8, 0.2)     | -0.033 (-0.084, 0.018)                             | -0.012 (-0.047, 0.024)    |
| Exhaustion                                                                 | -9.7 (-13.9, -5.5)***                              | -6.0 (-8.3, -3.6)*** | -6.4 (-9.0, -3.8)*** | -0.061 (-0.12, -0.01)                              | -0.047 (-0.085, -0.0097)* |
| Slow walking speed                                                         | -8.3 (-12.3, -4.3)***                              | -5.5 (-7.7, -3.2)*** | -5.7 (-8.1, -3.2)*** | 0.026 (-0.016, 0.069)                              | -0.0095 (-0.039, 0.020)   |
| Weakness                                                                   | -4.9 (-9.6, -0.2)*                                 | -2.3 (-4.9, 0.4)     | -3.0 (-6.0, -0.09)*  | 0.025 (-0.029, 0.078)                              | -0.0098 (-0.047, 0.027)   |
| Sarcopenia                                                                 | -0.6 (-5.9, 4.7)                                   | 0.8 (-2.2, 3.7)      | -0.004 (-3.3, 3.3)   | -0.048 (-0.10, 0.0069)                             | -0.020 (-0.058, 0.018)    |

SOS: speed of sound (m/s), BUA: broadband ultrasound attenuation (dB/MHz), QUI: quantitative ultrasound index

Lumbar spine and femoral neck BMD is measured in g/cm<sup>2</sup>

<sup>a</sup>The number of subjects included in the analyses varies by component of the Fried frailty category from 3008 to 3211 for heel quantitative ultrasound

<sup>b</sup>Adjusted for age, BMI and centre

\* p<0.05

\*\* p<0.01

\*\*\*p<0.001
